# Supplementary material for: A novel access to indole-3-substituted dihydrocoumarins in artificial sweetener saccharin based functional ionic liquids
Source: Royal Society of Chemistry journal article supplement (doi:10.1039/c2ra21284f), 2012-01-01

## Supporting Information

### A Novel Access for Indole-3-substituted Dihydrocoumarins in Artificial Sweetener Saccharin based Functional Ionic Liquid

Atul Kumar,\* Promod Kumar, Vishwa Deepak Tripathi and Suman Srivastava

Medicinal and Process Chemistry Division, CSIR, Central Drug Research Institute, Lucknow-  
226001, India  
[dratulsax@gmail.com](mailto:dratulsax@gmail.com)

**General:** All the reagents and solvents were purchased from Sigma-Aldrich or Merck chemical Co. and were used directly without any further purification. Organic solvents were concentrated under reduced pressure on a Büchi rotary evaporator. The progress of reaction was checked by thin-layer chromatography. The plates were visualized first with UV illumination followed by iodine. <sup>1</sup>H NMR spectra were recorded at 200 or 300 MHz using Bruker DRX-200 or 300 spectrometer and are reported in parts per million (ppm) on the  $\delta$  scale relative to TMS as an internal standard. Coupling constants (*J*) reported in Hz. <sup>13</sup>C NMR spectra were recorded at 50 or 75 MHz. Mass spectra were obtained using JEOL SX-102 (ESI) instrument. Elemental analysis was performed using a Perkin-Elmer autosystem XL analyzer. All melting points are uncorrected.

#### Representative experimental procedure for the functional ionic liquid [bmim][Sac]

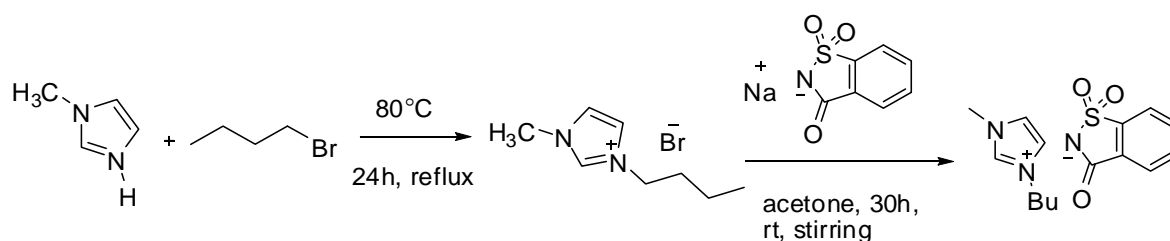

**Figure 1** Representative procedure for synthesis of [bmim][Sac].

#### Representative experimental procedure for the sodium salt of saccharinate.

A three-neck 100 ml round bottom flask was fitted with overhead stirrer, condenser and inlet/outlet for nitrogen atmosphere. The flask was charged with 7.32g saccharin (0.04 mol) and 2.16g (0.04 mol) anhydrous sodium methoxide in 50 ml anhydrous methanol. The mixture was stirred and heated to reflux for about 10-20 minutes under nitrogen. Most of the solids went into solution. The system was then set-up for distillation. Methanol was removed under reduced pressure. Colorless solids of sodium saccharin (yield 90%) remained in the flask.

### Preparation of the 1-n-butyl-3- methylimidazolium saccharinate [bmim][Sac]:

The sodium saccharinate (27.0 g, 0.112 mol) was added into a solution of 1-n-butyl-3-methylimidazolium bromide (BMImBr) (24.6 g, 0.112 mol) in 100 mL acetone at room temperature. After stirring for 24 h, the reaction mixture was filtered through a plug of celite. The volatiles were removed under reduced pressure overnight. Viscous oil was obtained. <sup>1</sup>H NMR (DMSO-d<sub>6</sub>, 300 MHz) δ<sub>H</sub>: 0.89 (t, *J* = 7.6 Hz, 3H), 1.28-1.21(m, 2H), 1.80-1.73 (m, 2H), 3.86 (s, 3H), 4.17 (t, *J* = 7.1 Hz, 2H), 7.71–7.78 (m, 4H), 7.75 (s, 1H), 7.82 (s, 1H), 9.18 (s, 1H). <sup>13</sup>C NMR (DMSO-d<sub>6</sub>, 50 MHz) δ<sub>C</sub>: 13.20, 18.70, 31.30, 35.71, 48.43, 119.98, 122.20, 122.45, 123.51, 128.25, 130.99, 131.46, 133.00, 136.47, 167.88.

### General procedure for the synthesis of indole-3-dihydrocoumarin derivatives via one pot multicomponent reaction of Indole, Salicylaldehyde and Meldrum acid:

A mixture of salicylaldehyde or 4-OMe-salicylaldehyde (1 mmol), meldrum acid (1 mmol), indole derivatives (1 mmol) and [bmim]Sac (2 ml) in a 50mL flask, and was vigorously stirred at room temperature (25–29 °C) for 8-10h, the progress of the reaction was monitored by TLC. Upon completion, the reaction mixture was extracted with ethyl acetate (3×20 ml). Then the combined organic part was dried over Na<sub>2</sub>SO<sub>4</sub> and the solvent was evaporated to yield a crude residue. The crude products thus obtained were purified by column chromatography (silica gel, 60-120 mesh; ethyl acetate/petroleum ether). All desired products were characterized by <sup>1</sup>H NMR, <sup>13</sup>C NMR and mass spectra.

**Reusability of the [C<sub>4</sub>MIM][Sac]:** After completion of the reaction, the reaction mixture was diluted with EtOAc (20 mL) followed by addition of a 5 mL of water. The EtOAc layer was separated. The EtOAc extract was dried (Na<sub>2</sub>SO<sub>4</sub>) and concentrated under vacuo to obtain the crude product. The aqueous extract/layer containing the ionic liquid was concentrated under vacuum at 80° C for 60 min to recover the IL which was found to be identical (spectral data) with an authentic sample of [bmim][Sac] (unused ionic liquid). The recovered IL was reused for 4 successive batches of reactions at rt to afford crude product after usual work-up (Table 1).

**Table 1 Reusability of 1-methyl-3-(n-butyl) imidazolium Saccharinate [(C<sub>4</sub>MIM)Sac] ionic liquid in indole -3 dihydricoumarin synthesis**

| Run       | 1  | 2  | 3  | 4  |
|-----------|----|----|----|----|
| Yield (%) | 93 | 91 | 87 | 85 |

<sup>a</sup>Reaction conditions: Indole (1.0 mmol), meldrum acid (1.0 mmol), salicylaldehyde (1.0 mmol), ionic liquid (2.0 mL), rt, 8 h. <sup>b</sup> Isolated yield.

## Characterization data for synthesized compounds:

### 4-(1H-indol-3-yl)chroman-2-one (a)

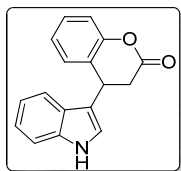

Physical state: oily.  $^1\text{H}$  NMR (300 MHz,  $\text{CDCl}_3$ )  $\delta_{\text{H}}$ : 8.20 (s, 1H), 7.84 (d,  $J = 7.7$  Hz, 1H), 7.37 (d,  $J = 8.1$  Hz, 1H), 7.31-7.18 (m, 1H), 7.13-6.79 (m, 5H) 6.79 (s, 1H), 4.63 (t,  $J = 6.18$  Hz, 1H), 3.26 (dd,  $J = 7.6, 15.8$  Hz, 1H), 3.09 (dd,  $J = 5.6, 15.8$  Hz, 1H).  $^{13}\text{C}$  NMR (75 MHz,  $\text{CDCl}_3$ )  $\delta_{\text{C}}$ : 168.6, 151.8, 136.9, 128.7, 128.4, 126.2, 125.9, 124.8, 122.7, 122.5, 120.0, 119.0, 117.2, 115.2, 111.8, 36.5, 32.8. Molecular formula:  $\text{C}_{17}\text{H}_{13}\text{NO}_2$ . ESI MS ( $m/z$ ) = 264 (M+H). Analysis calculated for  $\text{C}_{17}\text{H}_{13}\text{NO}_2$ : C 77.55, H 4.98, N 5.32. Found: C 77.53, H 4.97, N 5.29.

### 4-(5-bromo-1H-indol-3-yl)chroman-2-one (b)

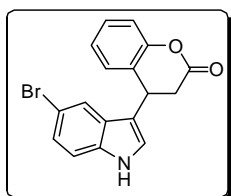

Physical state: oily.  $^1\text{H}$  NMR (300 MHz,  $\text{CDCl}_3$ )  $\delta_{\text{H}}$ : 8.29 (s, 1H), 7.54 (s, 1H), 7.25-7.12 (m, 3H), 7.05-6.95 (m, 3H), 6.67 (d,  $J = 2.1$  Hz, 1H), 4.49 (t,  $J = 6.1$  Hz, 1H), 3.11 (dd,  $J = 6.9, 15.7$  Hz, 1H), 2.97 (dd,  $J = 5.6, 15.7$  Hz, 1H).  $^{13}\text{C}$  NMR (75 MHz,  $\text{CDCl}_3$ )  $\delta_{\text{C}}$ : 168.4, 151.7, 135.5, 129.0, 128.2, 127.6, 125.7, 125.6, 125.0, 123.7, 121.4, 117.3, 114.9, 113.3, 113.2, 36.5, 32.6. Molecular formula:  $\text{C}_{17}\text{H}_{12}\text{BrNO}_2$ , ESI MS ( $m/z$ ): 342 (M+H). Analysis calculated for  $\text{C}_{17}\text{H}_{12}\text{BrNO}_2$ : C 59.67, H 3.53, N 4.09. Found, C 59.68, H 3.50, N 4.10

### 4-(5-methoxy-1H-indol-3-yl)chroman-2-one (c)

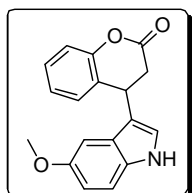

Physical state: White solid, mp: 155-157°C.  $^1\text{H}$  NMR (300 MHz,  $\text{CDCl}_3$ )  $\delta_{\text{H}}$ : 8.01 (s, 1H), 7.32-7.21 (m, 2H), 7.15 (t,  $J = 5.6$  Hz, 3H), 7.16-7.05 (m, 2H), 6.91 (s, 1H), 4.61 (t,  $J = 6.7$  Hz, 1H), 3.81 (s, 3H), 3.23 (dd,  $J = 7.6, 15.7$  Hz, 1H), 3.08 (dd,  $J = 5.6, 15.7$  Hz, 1H).  $^{13}\text{C}$  NMR (50 MHz,  $\text{CDCl}_3$ )  $\delta_{\text{C}}$ : 168.4, 154.2, 151.7, 131.9, 128.6, 128.2, 126.3, 126.0, 124.7, 123.0, 117.1, 114.7, 112.6, 112.4, 100.9, 56.0, 36.3, 32.6. Chemical Formula:  $\text{C}_{18}\text{H}_{15}\text{NO}_3$ . ESI MS ( $m/z$ ): 294 (M+H). Analysis calculated for  $\text{C}_{18}\text{H}_{15}\text{NO}_3$ : C 73.71, H 5.15, N 4.78. Found; C 73.73, H 5.11, N 4.80

### 4-(1-methyl-1H-indol-3-yl)chroman-2-one (d)

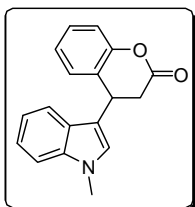

Physical state: oily:  $^1\text{H}$  NMR (300 MHz,  $\text{CDCl}_3$ )  $\delta_{\text{H}}$ : 7.41 (d,  $J = 7.9$  Hz, 1H), 7.26-7.15 (m, 3H), 7.10-6.97 (m, 4H), 6.59 (s, 1H), 4.56 (t,  $J = 6.1$  Hz, 1H), 3.63 (s, 3H), 3.15 (dd,  $J = 7.2, 15.7$  Hz, 1H), 2.98 (dd,  $J = 5.6, 15.7$  Hz, 1H).  $^{13}\text{C}$  NMR (75 MHz,  $\text{CDCl}_3$ )  $\delta_{\text{C}}$ : 29.7, 32.6, 36.5, 109.7, 113.7, 117.1, 118.9, 119.4, 122.1, 124.6, 126.9, 126.2, 128.2, 128.5, 12.5, 137.5, 151.7, 168.2. Molecular formula:  $\text{C}_{18}\text{H}_{15}\text{NO}_2$ . ESI MS ( $m/z$ ): 278 (M+H). Analysis calculated for  $\text{C}_{18}\text{H}_{15}\text{NO}_2$ : C 77.96, H 5.45, N 5.05. Found; C 77.92, H 5.46, N 5.08.

### 4-(1-allyl-1H-indol-3-yl)chroman-2-one (e)

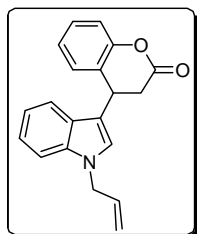

Physical state: oily.  $^1\text{H}$  NMR (300 MHz,  $\text{CDCl}_3$ )  $\delta_{\text{H}}$ : 7.52 (d,  $J = 7.7$  Hz, 1H), 7.36 (d,  $J = 7.6$  Hz, 3H), 7.29-7.10 (m, 4H), 6.77 (s, 1H), 6.02-5.93 (m, 1H), 5.21 (d,  $J = 10.1$

Hz, 1H), 5.09 (d,  $J = 17.1$  Hz, 1H), 4.68 (d,  $J = 9.9$  Hz, 2H), 4.31 (t,  $J = 6.8$  Hz, 1H), 3.27 (dd,  $J = 7.7, 15.7$  Hz, 1H), 3.11 (dd,  $J = 5.4, 15.7$  Hz, 1H).  $^{13}\text{C}$  NMR (50 MHz,  $\text{CDCl}_3$ )  $\delta_{\text{c}}$ : 168.2, 150.1, 136.9, 135.2, 133.1, 128.5, 128.2, 126.4, 125.8, 124.6, 122.2, 119.5, 119.0, 117.5, 117.1, 114.0, 110.1, 48.8, 36.4, 29.7. Molecular formula:  $\text{C}_{20}\text{H}_{17}\text{NO}_2$ . ESI MS ( $m/z$ ):= 304 (M+H). Analysis calculated for  $\text{C}_{20}\text{H}_{17}\text{NO}_2$ : C 79.19, H 5.65, N 4.62. Found; C 79.15, H 5.66, N 4.65.

#### 4-(1-allyl-1H-indol-3-yl)-7-methoxychroman-2-one (f)

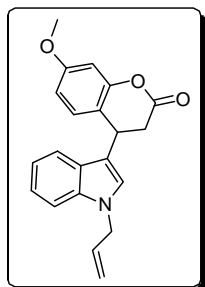

Physical state: oily:  $^1\text{H}$  NMR (300 MHz,  $\text{CDCl}_3$ )  $\delta_{\text{H}}$ : 7.40 (d,  $J = 7.9$  Hz, 1H), 7.26-7.15 (m, 2H), 7.03 (t,  $J = 6.41$ , 1H), 6.95 (d,  $J = 11.4$  Hz, 1H), 6.65 (s, 1H), 6.62 (d,  $J = 2.4$  Hz, 1H), 6.57-6.53 (m, 1H), 5.91-5.80 (m, 1H), 5.21 (d,  $J = 9.3$ , 1H), 5.10 (d,  $J = 9.3$  Hz, 1H), 4.41 (d,  $J = 4.05$  Hz, 2H), 4.23 (t,  $J = 6.6$  Hz, 1H), 3.73 (s, 3H), 3.14 (dd,  $J = 7.6, 15.7$  Hz, 1H), 2.98 (dd,  $J = 5.6, 15.7$  Hz, 1H).  $^{13}\text{C}$  NMR (50 MHz,  $\text{CDCl}_3$ )  $\delta_{\text{c}}$ : 168.4, 160.0, 152.5, 137.1, 133.4, 128.9, 126.0, 122.3, 119.6, 119.2, 118.0, 117.6, 115.5, 114.6, 110.8, 110.3, 102.7, 55.7, 49.0, 36.9, 32.2. Molecular formula:  $\text{C}_{21}\text{H}_{19}\text{NO}_3$ , ESI MS ( $m/z$ ):= 334 (M+H). Analysis calculated for  $\text{C}_{21}\text{H}_{19}\text{NO}_3$ : C 75.66, H 5.74, N 4.20. Found: C 75.62, H 5.70, N 4.21.

#### 4-(2-methyl-1H-indol-3-yl)chroman-2-one (g)

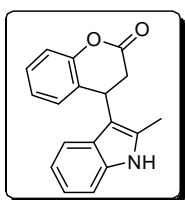

Physical state: White solid, mp: 108-110 °C.  $^1\text{H}$  NMR (300 MHz,  $\text{CDCl}_3$ )  $\delta_{\text{H}}$ : 7.99 (s, 1H), 7.36 (d,  $J = 7.2$  Hz, 1H), 7.29 (d,  $J = 6.74$ , 2H), 7.19-7.07 (m, 2H), 7.04-6.94 (m, 3H), 4.68 (t,  $J = 5.9$  Hz, 1H), 3.29 (dd,  $J = 13.2, 16.0$  Hz, 1H), 2.99 (dd,  $J = 5.2, 16.0$  Hz, 1H), 2.39 (s, 3H).  $^{13}\text{C}$  NMR (75 MHz,  $\text{CDCl}_3$ )  $\delta_{\text{c}}$ : 168.7, 151.9, 135.7, 132.8, 128.5, 128.1, 126.4, 125.6, 124.5, 121.4, 119.5, 119.0, 116.9, 110.7, 108.6, 35.9, 31.9, 12.0. Chemical Formula:  $\text{C}_{18}\text{H}_{15}\text{NO}_2$ , ESI MS ( $m/z$ ):= 278 (M+H). Analysis calculated for  $\text{C}_{18}\text{H}_{15}\text{NO}_2$ : C, 77.96; H, 5.45; N, 5.05. Found C, 77.99; H, 5.41; N, 5.07

#### 4-(1-ethyl-1H-indol-3-yl)chroman-2-one (h)

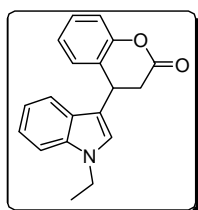

Physical state: oily:  $^1\text{H}$  NMR (300 MHz,  $\text{CDCl}_3$ )  $\delta_{\text{H}}$ : 7.55 (d,  $J = 7.8$  Hz, 1H), 7.42-7.27 (m, 4H), 7.21-7.10 (m, 3H), 6.81 (s, 1H), 4.66 (t,  $J = 6.1$  Hz, 1H), 4.17-4.10 (m, 2H), 3.13 (dd,  $J = 5.6, 15.8$  Hz, 1H), 3.29 (dd,  $J = 7.5, 15.8$  Hz, 1H), 1.46 (t,  $J = 7.3$  Hz, 3H).  $^{13}\text{C}$  NMR (75 MHz,  $\text{CDCl}_3$ )  $\delta_{\text{c}}$ : 168.3, 151.7, 136.6, 128.5, 128.2, 126.4, 126.3, 125.1, 124.6, 122.0, 119.3, 119.1, 117.1, 113.7, 109.9, 41.0, 36.5, 32.7, 15.4. Molecular formula:  $\text{C}_{19}\text{H}_{17}\text{NO}_2$ . ESI MS ( $m/z$ ):= 292 (M+H). Analysis calculated for  $\text{C}_{19}\text{H}_{17}\text{NO}_2$ : C 78.33, H 5.88, N 4.81. Found C 78.30, H 5.90, N 4.80.

#### 4-(1-butyl-1H-indol-3-yl)-7-methoxychroman-2-one (i)

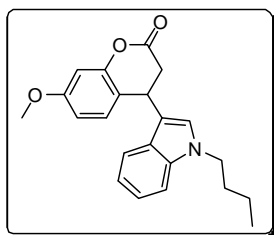

Physical state: oily.  $^1\text{H}$  NMR (300 MHz,  $\text{CDCl}_3$ )  $\delta_{\text{H}}$ : 7.50 (d,  $J = 7.9$  Hz, 1H), 7.37 (d,  $J = 7.2$  Hz, 1H), 7.24 (d,  $J = 7.5$  Hz, 1H), 7.14-7.05 (m, 2H), 6.76 (s, 1H), 6.73 (d,  $J = 2.4$  Hz, 1H), 6.67-6.63 (m, 1H), 4.61 (t,  $J = 8.9$  Hz, 1H), 4.07 (t,  $J = 7.1$  Hz, 2H), 3.84 (s, 3H), 3.24 (dd,  $J = 7.7, 15.7$  Hz, 1H), 3.08 (dd,  $J = 5.6, 15.7$  Hz, 1H), 1.85-1.75 (m, 2H), 1.38-1.30 (m, 2H), .95 (t,  $J = 4.4$  Hz,

3H).  $^{13}\text{C}$  NMR (50 MHz,  $\text{CDCl}_3$ )  $\delta_{\text{c}}$ : 168.3, 159.8, 152.4, 136.8, 128.9, 126.3, 125.8, 121.9, 119.2, 119.1, 118.1, 113.9, 110.6, 110.0, 102.5, 55.6, 46.2, 36.8, 32.3, 32.0, 20.2, 13.8. Chemical Formula:  $\text{C}_{22}\text{H}_{23}\text{NO}_3$ . ESI MS ( $m/z$ ):= 350 (M+H). Analysis calculated for  $\text{C}_{22}\text{H}_{23}\text{NO}_3$ : C, 75.62; H, 6.63; N, 4.01, Found, C, 75.64, H, 6.62, N, 4.05.

#### 4-(1-butyl-1H-indol-3-yl)chroman-2-one (j)

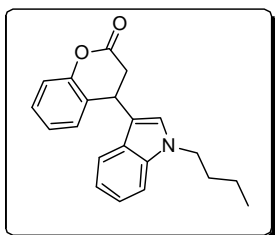

Physical state: oily:  $^1\text{H}$  NMR (300 MHz,  $\text{CDCl}_3$ )  $\delta_{\text{H}}$ : 7.52 (d,  $J = 7.9$  Hz, 1H), 7.39-7.24 (m, 2H), 7.18 (d,  $J = 4.7$  Hz, 2H), 7.10 (t,  $J = 8.9$  Hz, 3H), 6.77 (s, 1H), 4.68 (t,  $J = 5.9$  Hz, 1H), 4.07 (t,  $J = 7.1$  Hz, 2H), 3.27 (dd,  $J = 7.7, 15.7$  Hz, 1H), 3.11 (dd,  $J = 5.6, 15.7$  Hz, 1H), 1.85-1.75 (m, 2H), 1.38-1.30 (m, 2H), 94 (t,  $J = 7.3$  Hz, 3H).  $^{13}\text{C}$  NMR (50 MHz,  $\text{CDCl}_3$ )  $\delta_{\text{c}}$ : 168.3, 151.6, 137.9, 128.5, 128.2, 126.3, 126.2, 125.8, 124.6, 121.9, 119.2, 119.0, 117.0, 113.4, 109.9, 46.2, 36.5, 32.6, 32.3, 20.2, 13.7. Chemical Formula:

$\text{C}_{21}\text{H}_{21}\text{NO}_2$ . ESI MS ( $m/z$ ):= 320 (M+H). Analysis calculated for  $\text{C}_{21}\text{H}_{21}\text{NO}_2$ : C, 78.97; H, 6.63; N, 4.39; Found; C, 78.99; H, 6.62; N, 4.43.

#### 7-methoxy-4-(5-methoxy-1H-indol-3-yl)chroman-2-one (k)

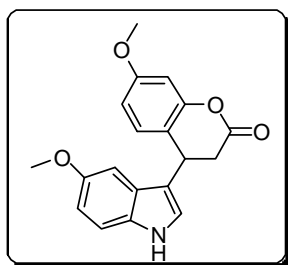

Physical state: White solid, mp: 136-138°C.  $^1\text{H}$  NMR (300 MHz,  $\text{CDCl}_3$ )  $\delta_{\text{H}}$ : 8.05 (s, 1H), 7.25 (s, 1H), 7.03 (d,  $J = 7.43$  Hz, 1H), 6.88 (d,  $J = 9.6$  Hz, 2H), 6.78 (d,  $J = 2.0$  Hz, 1H), 6.63 (d,  $J = 2.16$ , 1H), 6.61 (d,  $J = 2.16$  Hz, 1H), 4.55 (t,  $J = 6.3$  Hz, 1H), 3.81 (s, 3H), 3.80 (s, 3H), 3.19 (dd,  $J = 7.6$  Hz, 15.7 Hz, 1H), 3.05 (dd,  $J = 5.6, 15.7$  Hz, 1H).  $^{13}\text{C}$  NMR (50 MHz,  $\text{CDCl}_3$ )  $\delta_{\text{c}}$ : 168.3, 159.8, 154.1, 152.3, 131.9, 128.2, 126.2, 122.9, 117.8, 115.2, 112.5, 112.3, 110.6, 102.5, 100.9, 56.0, 55.6, 36.5, 32.0. Chemical Formula:

$\text{C}_{19}\text{H}_{17}\text{NO}_4$ . ESI MS ( $m/z$ ):= 324 (M+H). Analysis calculated for  $\text{C}_{19}\text{H}_{17}\text{NO}_4$ : C 70.58, H 5.30, N 4.33, Found; C 70.57, H 5.344, N 4.35.

#### 4-(1H-indol-3-yl)-7-methoxychroman-2-one (l)

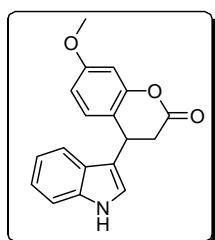

Physical state: oily:  $^1\text{H}$  NMR (300 MHz,  $\text{CDCl}_3$ )  $\delta_{\text{H}}$ : 8.08 (s, 1H), 7.40 (d,  $J = 7.8$  Hz, 1H), 7.29 (d,  $J = 8.1$  Hz, 1H), 7.17-7.11 (m, 1H), 7.02 (t,  $J = 7.1$  Hz, 1H), 6.94 (d,  $J = 11.4$ , 1H), 6.73 (d,  $J = 2.2$  Hz, 1H), 6.61 (d,  $J = 2.4$  Hz, 1H), 6.55-6.52 (m, 1H), 4.59 (t,  $J = 3.5$  Hz, 1H), 3.72 (s, 3H), 3.41 (dd,  $J = 7.6, 15.7$  Hz, 1H), 2.97 (dd,  $J = 5.6, 15.7$  Hz, 1H).  $^{13}\text{C}$  NMR (50 MHz,  $\text{CDCl}_3$ )  $\delta_{\text{c}}$ : 166.5, 160.0, 152.5, 137.0, 128.9, 125.9, 122.7, 122.4, 120.0, 119.0, 118.0, 115.7, 111.8, 10.8, 102.7, 55.7, 36.8, 32.2. Molecular formula- $\text{C}_{18}\text{H}_{15}\text{NO}_3$ , ESI MS ( $m/z$ ):= 294 (M+H). Analysis

calculated for  $\text{C}_{18}\text{H}_{15}\text{NO}_3$ : C 73.71, H 5.15, N 4.78. Found, C 73.67, H 5.16, N 4.75

#### 4-(1-ethyl-1H-indol-3-yl)-7-methoxychroman-2-one (m)

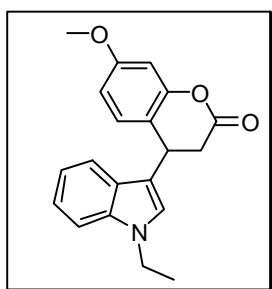

Physical state: White solid, mp: 96-98°C:  $^1\text{H}$  NMR (300 MHz,  $\text{CDCl}_3$ )  $\delta_{\text{H}}$ : 7.51 (d,  $J = 7.8$  Hz, 1H), 7.38 (d,  $J = 8.2$  Hz, 1H), 7.34-7.27 (m, 1H), 7.16-7.06 (m, 2H), 6.78 (s, 1H), 6.73 (d,  $J = 2.2$  Hz, 1H), 6.68-6.64 (m, 1H), 4.62

(t,  $J = 6.1$  Hz, 1H), 4.17-4.09 (m, 2H), 3.84 (s, 3H), 3.25 (dd,  $J = 7.5, 15.7$  Hz, 1H), 3.09 (dd,  $J = 5.64, 15.7$  Hz, 1H), 1.45 (t,  $J = 7.2$  Hz, 3H).  $^{13}\text{C}$  NMR (75 MHz,  $\text{CDCl}_3$ )  $\delta_{\text{c}}$ : 168.3, 159.8, 152.3, 136.5, 128.8, 126.3, 125.1, 121.9, 119.2, 119.1, 118.0, 114.1, 110.6, 109.8, 102.5, 55.6, 41.0, 36.7, 32.0, 15.4. Molecular formula:  $\text{C}_{20}\text{H}_{19}\text{NO}_3$ . ESI MS ( $m/z$ ):= 322 (M+H). Analysis calculated for  $\text{C}_{20}\text{H}_{19}\text{NO}_3$ : C 74.75, H 5.96, N 4.36. Found C 74.78, H 5.92, N 4.33.

#### 4-(1-benzyl-1H-indol-3-yl)chroman-2-one (n)

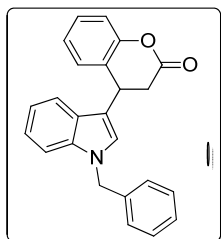

Physical state: oily.  $^1\text{H}$  NMR (300 MHz,  $\text{CDCl}_3$ )  $\delta_{\text{H}}$ : 7.48 (d,  $J = 7.7$  Hz, 1H), 7.26-7.19 (m, 6H), 7.16 (d,  $J = 7.2$  Hz, 1H), 7.11 (t,  $J = 5.2$  Hz, 1H), 7.09 (d,  $J = 3.3$  Hz, 1H), 7.05 (t,  $J = 5.19$  Hz, 3H), 6.78 (s, 1H), 5.21 (s, 2H), 4.43 (t,  $J = 6.1$  Hz, 1H), 3.72 (dd,  $J = 7.9, 15.8$  Hz, 1H), 3.05 (dd,  $J = 5.5, 15.8$  Hz, 1H).  $^{13}\text{C}$  NMR (75 MHz,  $\text{CDCl}_3$ )  $\delta_{\text{c}}$ : 168.2, 151.7, 137.2, 137.1, 128.7, 128.6, 128.3, 128.2, 127.7, 126.5, 126.4, 126.1, 124.6, 122.4, 119.7, 119.2, 117.0, 114.2, 110.4, 50.1, 36.4, 32.6. Molecular formula  $\text{C}_{24}\text{H}_{19}\text{NO}_2$ . ESI MS ( $m/z$ ):= 354 (M+H). Analysis calculated for  $\text{C}_{24}\text{H}_{19}\text{NO}_2$ : C 81.56, H 5.42, N 3.96 Found: C 81.59, H 5.40, N 3.98.

#### 4-(2-phenyl-1H-indol-3-yl)chroman-2-one (o)

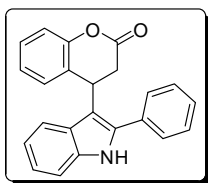

Physical state: White solid, mp:  $>250^\circ\text{C}$ .  $^1\text{H}$  NMR (300 MHz,  $\text{CDCl}_3$ )  $\delta_{\text{H}}$ : 8.30 (s, 1H), 7.48 (d,  $J = 6.4$  Hz, 5H), 7.32-7.22 (m, 3H), 7.16 (t,  $J = 8.9$  Hz, 2H), 7.37 (d,  $J = 2.9$  Hz, 3H), 4.84 (dd,  $J = 4.6, 14.1$  Hz, 1H), 3.41 (t,  $J = 15.9$  Hz, 1H), 2.98 (dd,  $J = 4.8, 15.9$  Hz, 1H).  $^{13}\text{C}$  NMR (75 MHz,  $\text{CDCl}_3$ )  $\delta_{\text{c}}$ : 167.8, 151.3, 137.0, 136.6, 132.2, 128.8, 128.5, 128.3, 128.0, 127.6, 126.2, 125.8, 124.2, 121.5, 119.9, 118.8, 116.4, 111.7, 108.4, 35.0, 31.4. Molecular formula:  $\text{C}_{23}\text{H}_{17}\text{NO}_2$ . ESI MS ( $m/z$ ):= 340 (M+H). Analysis calculated for  $\text{C}_{23}\text{H}_{17}\text{NO}_2$ : C 81.40, H 5.05, N 4.13. Found; C 81.41, H 5.09, N 4.16.

#### 4-(6-ethyl-1H-indol-3-yl)chroman-2-one (p)

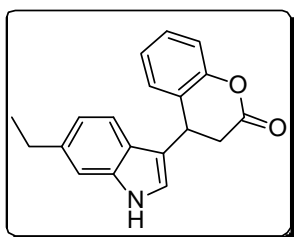

Physical state: oily.  $^1\text{H}$  NMR (300 MHz,  $\text{CDCl}_3$ )  $\delta_{\text{H}}$ : 8.27 (s, 1H), 7.42-7.34 (m, 2H), 7.18 (s, 1H), 7.16-7.10 (m, 4H), 6.81 (s, 1H), 4.68 (t,  $J = 6.2$  Hz, 1H), 3.30 (dd,  $J = 7.6$  Hz, 15.8 Hz, 1H), 3.12 (dd,  $J = 11.2, 15.8$  Hz, 1H), 2.92-2.84 (m, 2H), 1.39 (t,  $J = 7.5$  Hz, 3H).  $^{13}\text{C}$  NMR (50 MHz,  $\text{CDCl}_3$ )  $\delta_{\text{c}}$ : 168.6, 151.6, 135.7, 128.6, 128.3, 127.3, 126.2, 125.5, 124.7, 122.1, 121.1, 120.2, 117.0, 116.6, 115.4, 36.4, 32.8, 24.0, 13.8. Chemical Formula:  $\text{C}_{19}\text{H}_{17}\text{NO}_2$ . ESI MS ( $m/z$ ):= 292 (M+H). Analysis calculated for  $\text{C}_{19}\text{H}_{17}\text{NO}_2$ : C 78.33, H 5.88, N 4.81. Found; C 78.35, H 5.85, N 4.80.

## Spectral data for synthesized compounds (a-p).

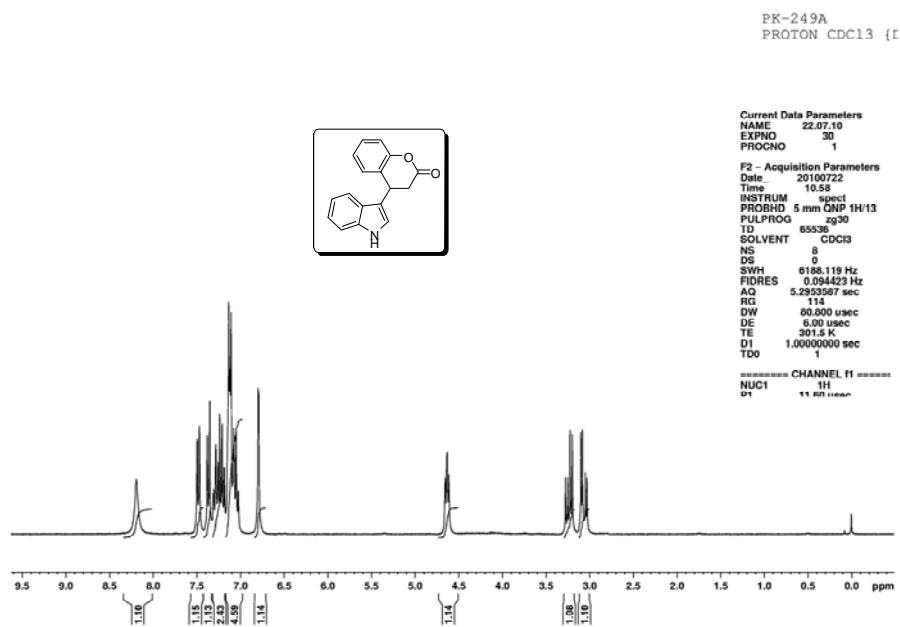

PK-249 A  
C13CPD CDCl3 {D:\cdri

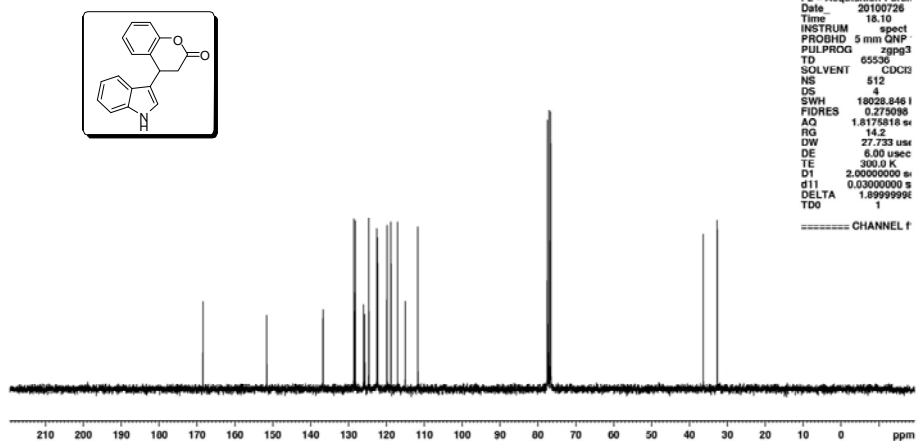

PK-275A  
PROTON CDC13 {D:\cdr\}

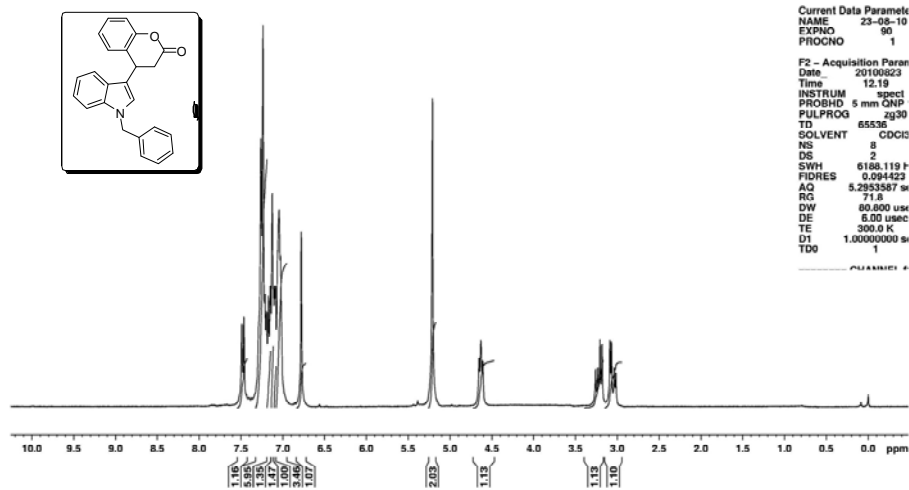

PK-275A  
C13CPD CDC1

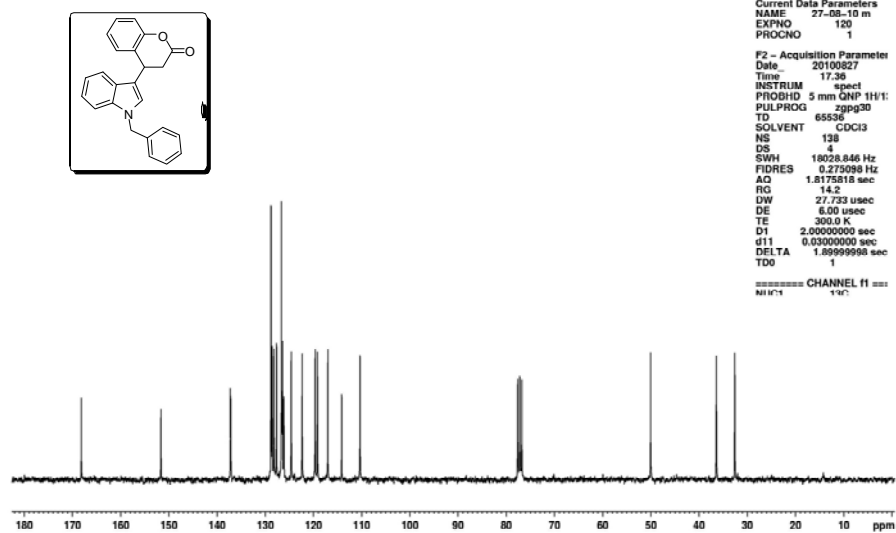



PK-266B  
 PROTON CDC13 {D

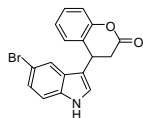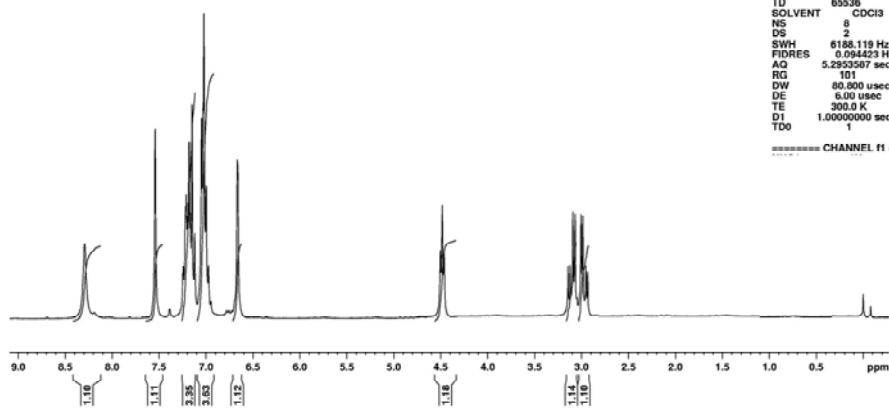

Current Data Parameter  
 NAME 17-06\_10 evn  
 EXPNO 30  
 PROCNO 1  
 F2 - Acquisition Param  
 Date\_ 20100818  
 Time 10.34  
 INSTRUM spect  
 PROBHD 5 mm QNP 1H  
 PULPROG zgpg30  
 TD 65536  
 SOLVENT CDC13  
 NS 8  
 DS 2  
 SWH 6188.119 Hz  
 FIDRES 0.094423 Hz  
 AQ 5.293507 sec  
 RG 101  
 DW 80.800 usec  
 DE 6.00 usec  
 TE 300.0 K  
 D1 1.0000000 sec  
 TDO 1  
 ===== CHANNEL f1 =====

PK-266B  
 C13CPD CDC13 {D:\cdri} user 12

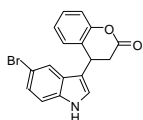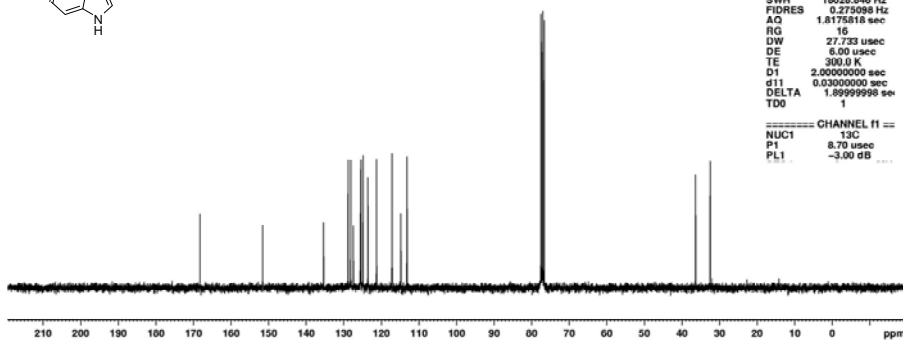

Current Data Parameters  
 NAME 20-08-10  
 EXPNO 120  
 PROCNO 1  
 F2 - Acquisition Paramete  
 Date\_ 20100820  
 Time 14.20  
 INSTRUM spect  
 PROBHD 5 mm QNP 1H/1  
 PULPROG zgpg30  
 TD 65536  
 SOLVENT CDC13  
 NS 4  
 DS 4  
 SWH 18028.846 Hz  
 FIDRES 0.275088 Hz  
 AQ 1.8175816 sec  
 RG 16  
 DW 27.733 usec  
 DE 6.00 usec  
 TE 300.0 K  
 D1 2.0000000 sec  
 d11 0.0300000 sec  
 DELTA 1.8999998 sec  
 TDO 1  
 ===== CHANNEL f1 =====  
 NUC1 13C  
 P1 8.70 usec  
 PL1 -3.00 dB

PK-461A

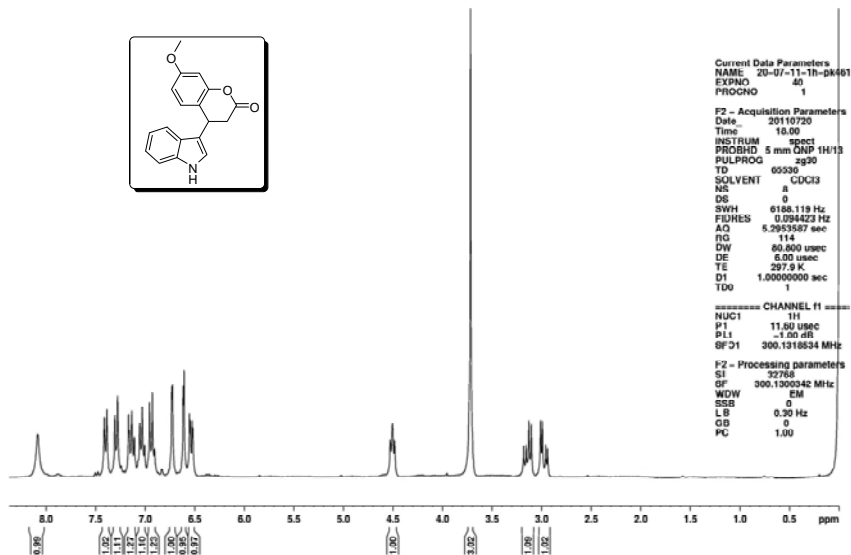

PK-461A

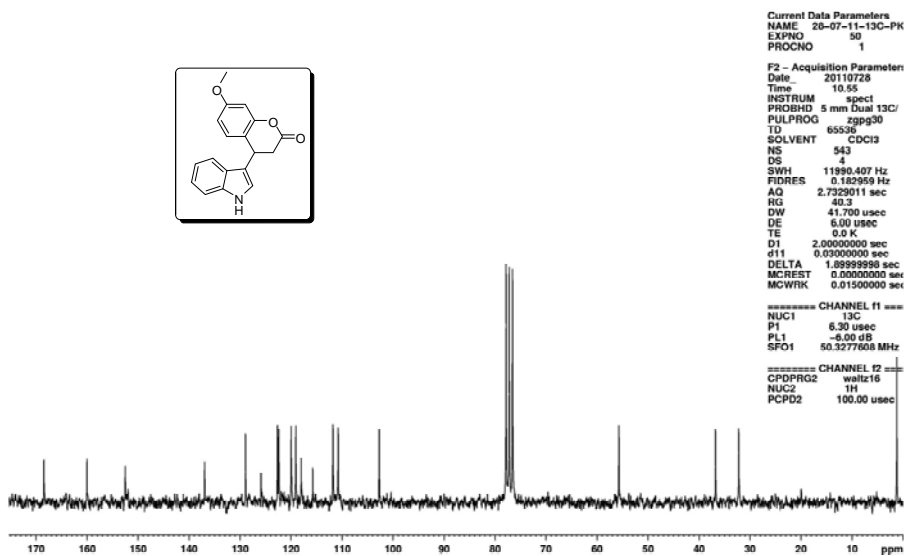

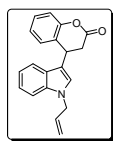

SI-005

**1H NMR**  
Chemical shift (ppm): 7.25 (d, 1H), 7.15 (d, 1H), 7.05 (d, 1H), 6.95 (d, 1H), 6.85 (d, 1H), 6.75 (d, 1H), 6.65 (d, 1H), 6.55 (d, 1H), 6.45 (d, 1H), 6.35 (d, 1H), 6.25 (d, 1H), 6.15 (d, 1H), 6.05 (d, 1H), 5.95 (d, 1H), 5.85 (d, 1H), 5.75 (d, 1H), 5.65 (d, 1H), 5.55 (d, 1H), 5.45 (d, 1H), 5.35 (d, 1H), 5.25 (d, 1H), 5.15 (d, 1H), 5.05 (d, 1H), 4.95 (d, 1H), 4.85 (d, 1H), 4.75 (d, 1H), 4.65 (d, 1H), 4.55 (d, 1H), 4.45 (d, 1H), 4.35 (d, 1H), 4.25 (d, 1H), 4.15 (d, 1H), 4.05 (d, 1H), 3.95 (d, 1H), 3.85 (d, 1H), 3.75 (d, 1H), 3.65 (d, 1H), 3.55 (d, 1H), 3.45 (d, 1H), 3.35 (d, 1H), 3.25 (d, 1H), 3.15 (d, 1H), 3.05 (d, 1H), 2.95 (d, 1H), 2.85 (d, 1H), 2.75 (d, 1H), 2.65 (d, 1H), 2.55 (d, 1H), 2.45 (d, 1H), 2.35 (d, 1H), 2.25 (d, 1H), 2.15 (d, 1H), 2.05 (d, 1H), 1.95 (d, 1H), 1.85 (d, 1H), 1.75 (d, 1H), 1.65 (d, 1H), 1.55 (d, 1H), 1.45 (d, 1H), 1.35 (d, 1H), 1.25 (d, 1H), 1.15 (d, 1H), 1.05 (d, 1H), 1.00 (s, 3H), 0.95 (d, 1H), 0.90 (d, 1H), 0.85 (d, 1H), 0.80 (d, 1H), 0.75 (d, 1H), 0.70 (d, 1H), 0.65 (d, 1H), 0.60 (d, 1H), 0.55 (d, 1H), 0.50 (d, 1H), 0.45 (d, 1H), 0.40 (d, 1H), 0.35 (d, 1H), 0.30 (d, 1H), 0.25 (d, 1H), 0.20 (d, 1H), 0.15 (d, 1H), 0.10 (d, 1H), 0.05 (d, 1H), 0.00 (s, 3H).

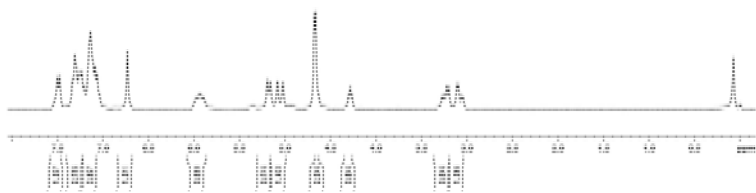

SI-006

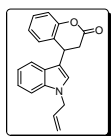

**1H NMR**  
Chemical shift (ppm): 7.25 (d, 1H), 7.15 (d, 1H), 7.05 (d, 1H), 6.95 (d, 1H), 6.85 (d, 1H), 6.75 (d, 1H), 6.65 (d, 1H), 6.55 (d, 1H), 6.45 (d, 1H), 6.35 (d, 1H), 6.25 (d, 1H), 6.15 (d, 1H), 6.05 (d, 1H), 5.95 (d, 1H), 5.85 (d, 1H), 5.75 (d, 1H), 5.65 (d, 1H), 5.55 (d, 1H), 5.45 (d, 1H), 5.35 (d, 1H), 5.25 (d, 1H), 5.15 (d, 1H), 5.05 (d, 1H), 4.95 (d, 1H), 4.85 (d, 1H), 4.75 (d, 1H), 4.65 (d, 1H), 4.55 (d, 1H), 4.45 (d, 1H), 4.35 (d, 1H), 4.25 (d, 1H), 4.15 (d, 1H), 4.05 (d, 1H), 3.95 (d, 1H), 3.85 (d, 1H), 3.75 (d, 1H), 3.65 (d, 1H), 3.55 (d, 1H), 3.45 (d, 1H), 3.35 (d, 1H), 3.25 (d, 1H), 3.15 (d, 1H), 3.05 (d, 1H), 2.95 (d, 1H), 2.85 (d, 1H), 2.75 (d, 1H), 2.65 (d, 1H), 2.55 (d, 1H), 2.45 (d, 1H), 2.35 (d, 1H), 2.25 (d, 1H), 2.15 (d, 1H), 2.05 (d, 1H), 1.95 (d, 1H), 1.85 (d, 1H), 1.75 (d, 1H), 1.65 (d, 1H), 1.55 (d, 1H), 1.45 (d, 1H), 1.35 (d, 1H), 1.25 (d, 1H), 1.15 (d, 1H), 1.00 (s, 3H), 0.95 (d, 1H), 0.90 (d, 1H), 0.85 (d, 1H), 0.80 (d, 1H), 0.75 (d, 1H), 0.70 (d, 1H), 0.65 (d, 1H), 0.60 (d, 1H), 0.55 (d, 1H), 0.50 (d, 1H), 0.45 (d, 1H), 0.40 (d, 1H), 0.35 (d, 1H), 0.30 (d, 1H), 0.25 (d, 1H), 0.20 (d, 1H), 0.15 (d, 1H), 0.10 (d, 1H), 0.05 (d, 1H), 0.00 (s, 3H).

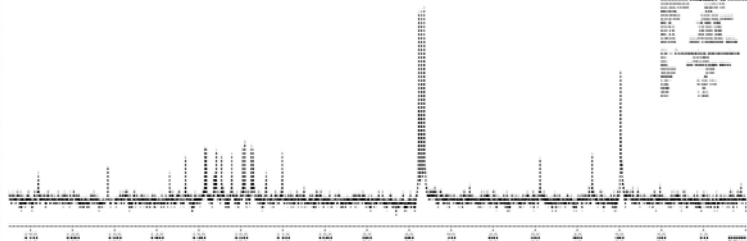

PK-509

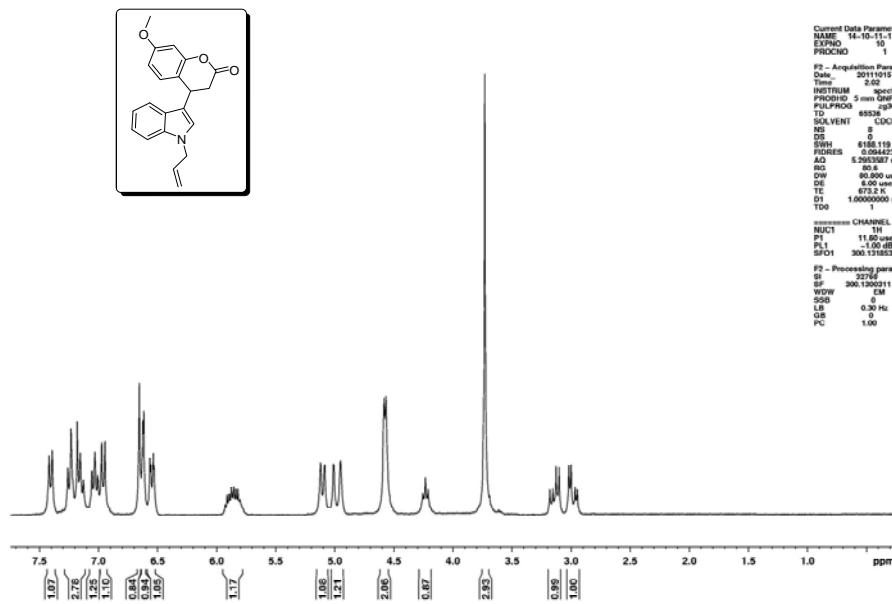

PK-509

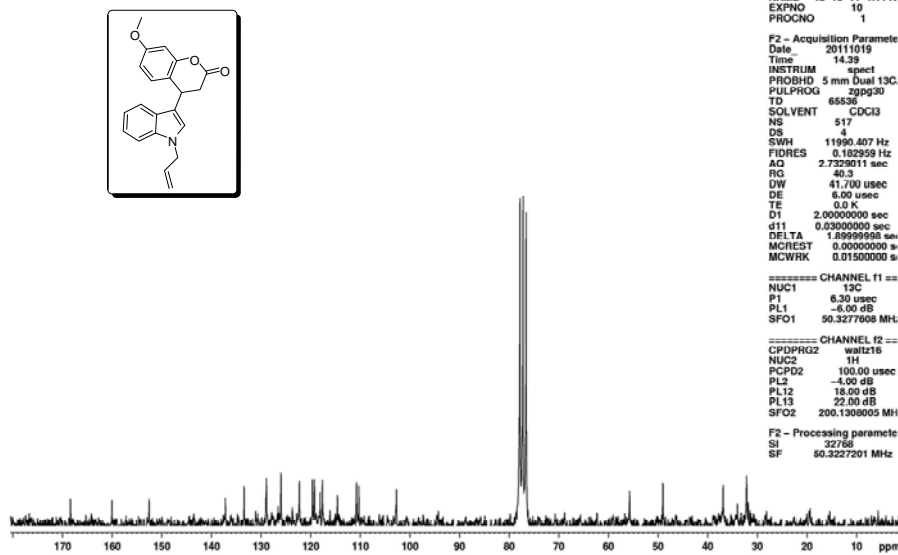

PK-513

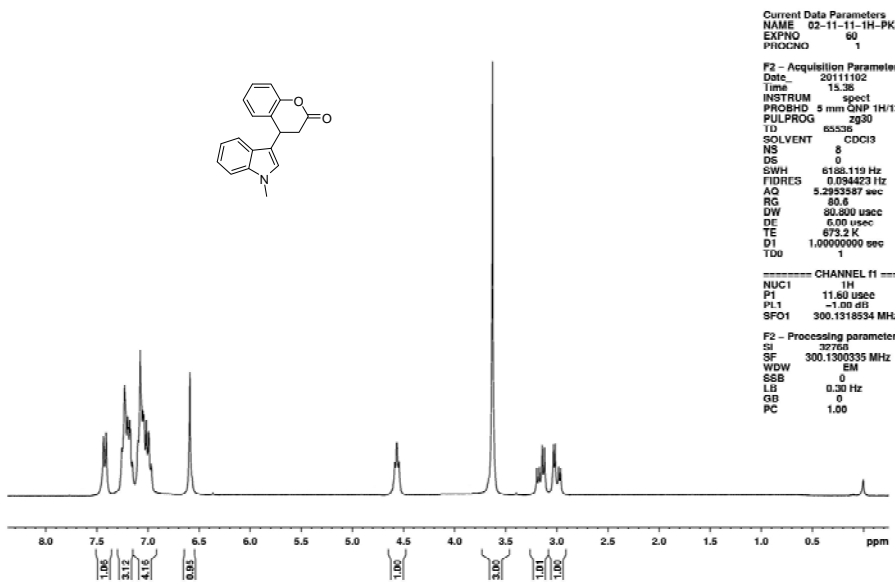

PK-513

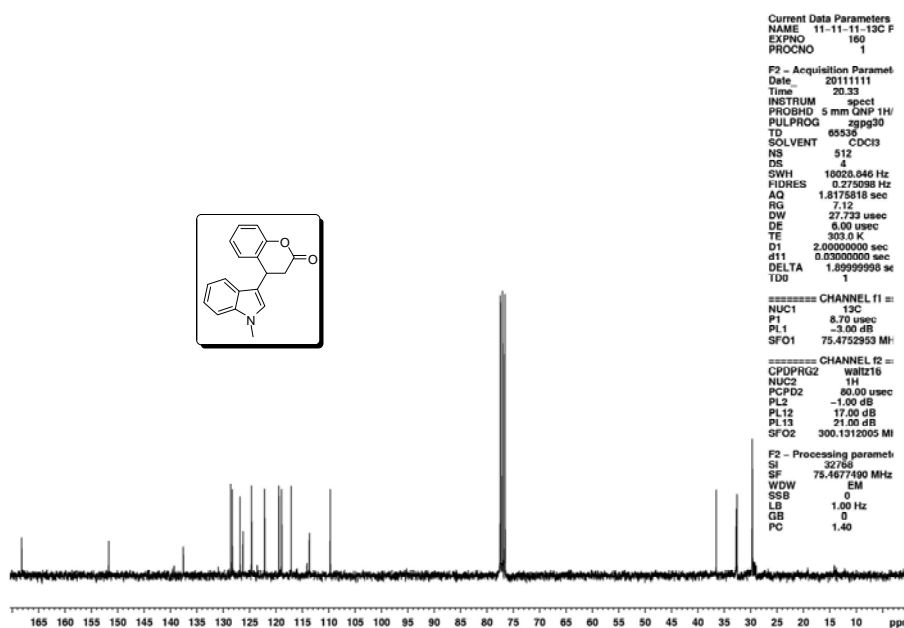

PK-494

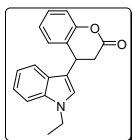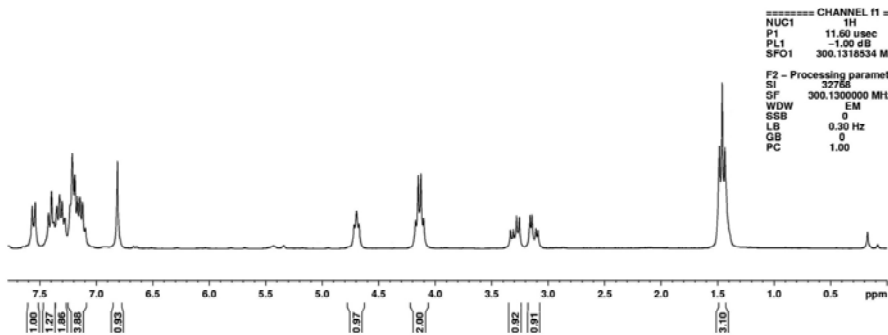

Current Data Parameters  
 NAME 27-09-11-1H-PK  
 EXPNO 60  
 PROCNO 1

F2 - Acquisition Parameter  
 Date 20110927  
 Time 13.26  
 INSTRUM spect  
 PROBHD 5 mm QNP 1H/1  
 PULPROG zg30  
 TD 65536  
 SOLVENT CDCl3  
 NS 8  
 DS 0  
 SWH 6166.119 Hz  
 FIDRES 0.094423 Hz  
 AQ 5.263367 sec  
 RG 4  
 DW 86.000 usec  
 DE 6.00 usec  
 TE 673.2 K  
 D1 1.0000000 sec  
 TDO 1

===== CHANNEL f1 =====  
 NUC1 1H  
 P1 11.50 usec  
 PL1 -1.00 dB  
 SFO1 300.131534 MHz

F2 - Processing parameter  
 SI 32768  
 SF 300.130000 MHz  
 WDW EM  
 SSB 0  
 LB 0.30 Hz  
 GB 0  
 PC 1.00

PK-494

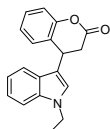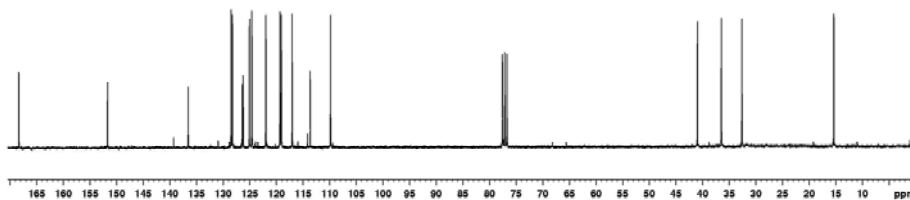

Current Data Parameters  
 NAME 30-09-11-13C-PK-494  
 EXPNO 209  
 PROCNO 1

F2 - Acquisition Parameter  
 Date 20110930  
 Time 5.10  
 INSTRUM spect  
 PROBHD 5 mm QNP 1H/13  
 PULPROG zgpg30  
 TD 65536  
 SOLVENT CDCl3  
 NS 912  
 DS 0  
 SWH 10262.816 Hz  
 FIDRES 0.272999 Hz  
 AQ 1.6175216 sec  
 RG 32768  
 DW 27.723 usec  
 DE 8.20 usec  
 TE 673.2 K  
 D1 3.0000000 sec  
 d11 0.0000000 sec  
 DELTA 1.3200000 sec  
 TDO 1

===== CHANNEL f1 =====  
 NUC1 13C  
 P1 8.70 usec  
 PL1 -2.00 dB  
 SFO1 76.4702943 MHz

===== CHANNEL f2 =====  
 CPDPRG2 waltz16  
 NUC2 1H  
 PCPD2 30.00 usec  
 PL2 1.00 dB  
 PL12 17.00 dB  
 PL13 21.00 dB  
 SFO2 300.1315000 MHz

F2 - Processing parameter  
 SI 32768  
 SF 76.4677029 MHz  
 WDW EM  
 SSB 0  
 LB 1.00 Hz  
 GB 0  
 PC 1.40

PK-549A

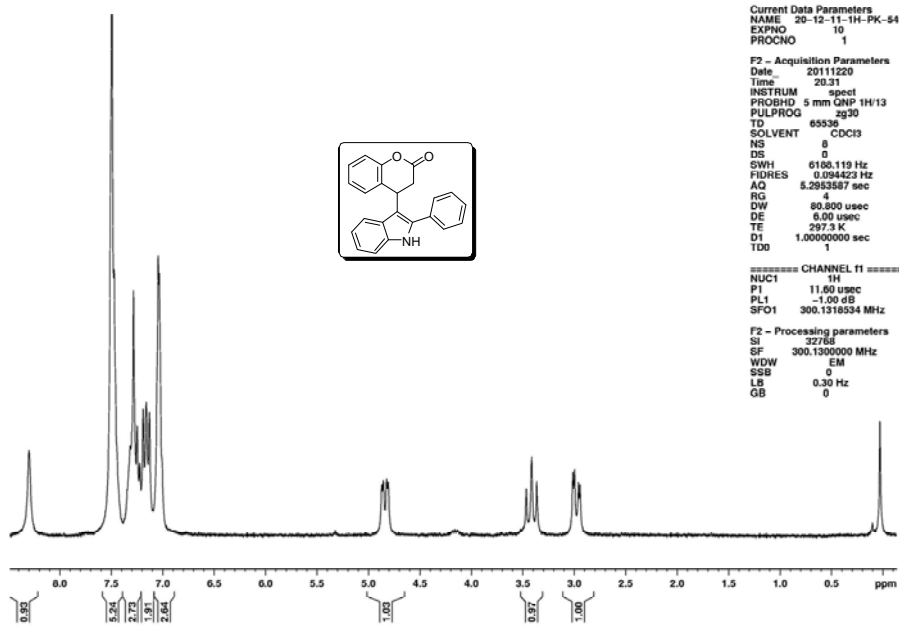

PK-549A

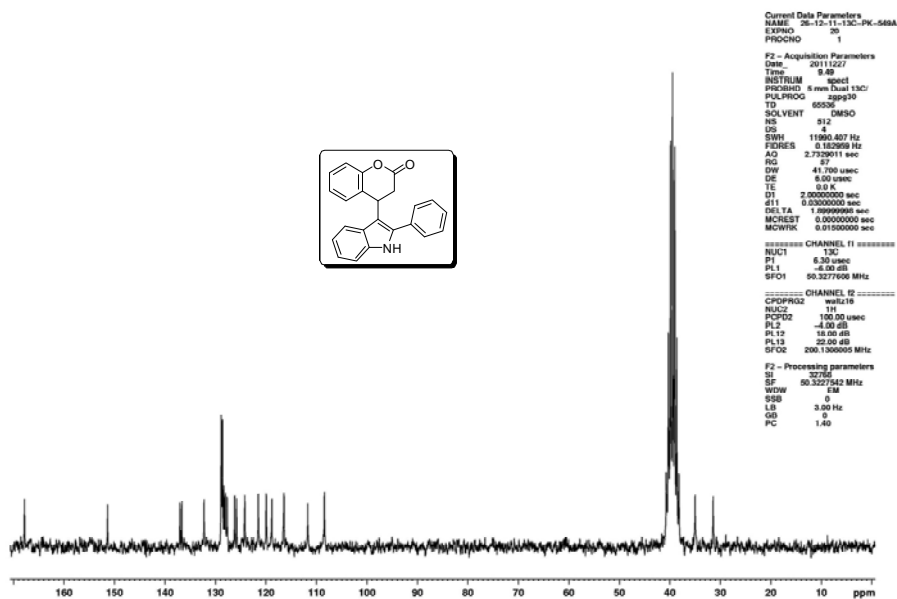

PK-561

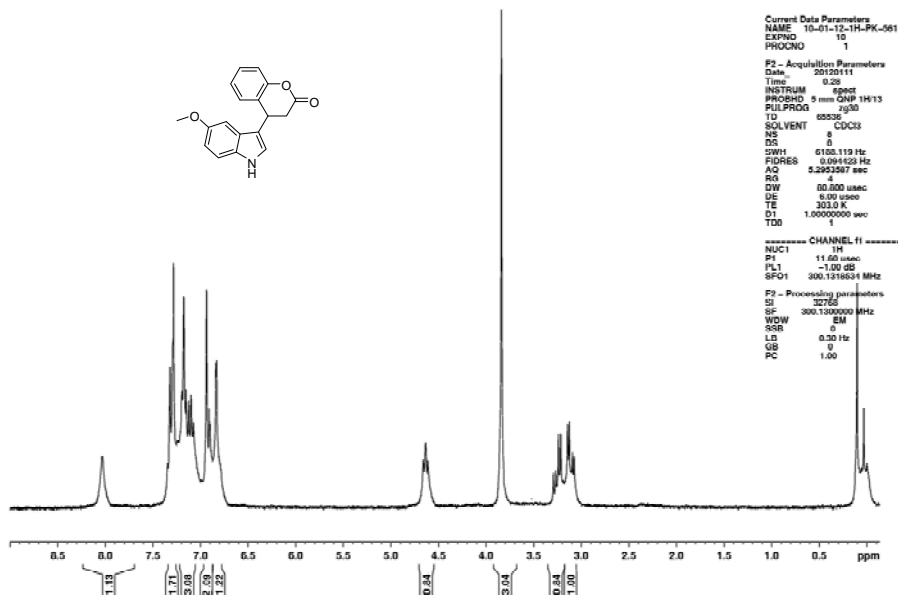

PK-561

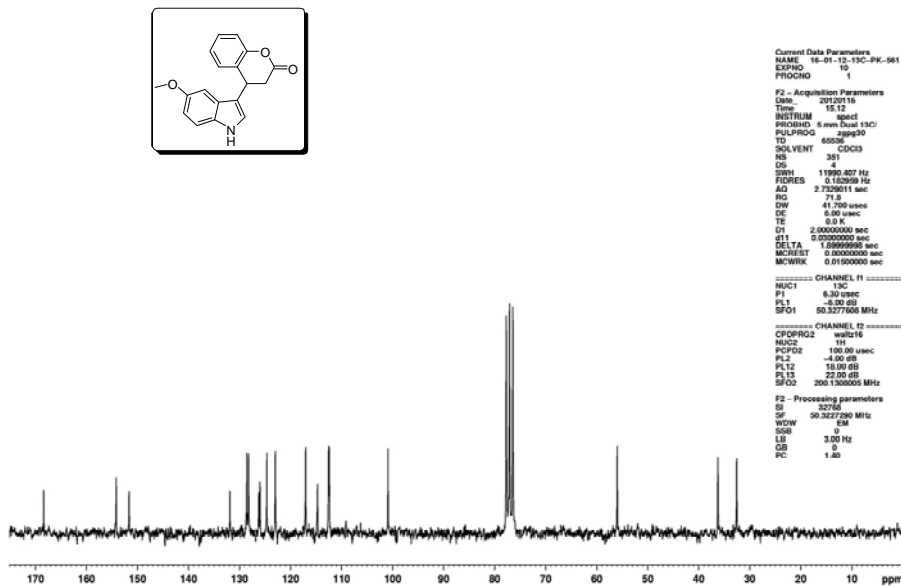



PK-542A

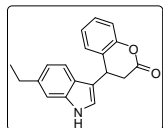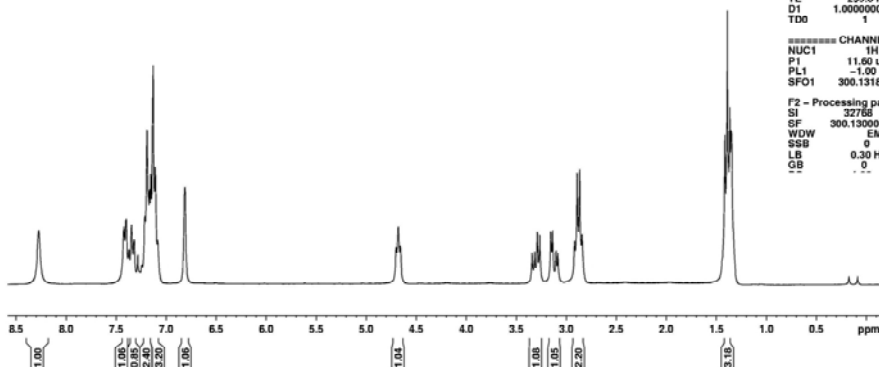

Current Data Parameters  
 NAME 16-12-11-1H-  
 EXPNO 30  
 PROCNO 1  
 F2 - Acquisition Parameters  
 Date\_ 20111217  
 Time 4.32  
 INSTRUM spect  
 PROBHD 5 mm QNP 1  
 PULPROG zgpg30  
 TD 65536  
 SOLVENT CDCl3  
 NS 8  
 DS 0  
 SWH 0160.119 Hz  
 FIDRES 0.0944221  
 AQ 5.295387 se  
 RG 8  
 DW 80.800 usec  
 DE 0.00 usec  
 TE 295.2 K  
 D1 1.0000000 se  
 TDD 1  
 ===== CHANNEL f1  
 NUC1 1H  
 P1 11.60 usec  
 PL1 -1.00 dB  
 SFO1 300.1318534  
 F2 - Processing parameters  
 SI 32768  
 SF 300.1300000 M  
 WDW EM  
 SSB 0  
 LB 0.30 Hz  
 GB 0  
 --

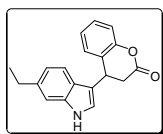

PK-542A

Current Data Parameters  
 NAME 16-01-12-13C-PK-542  
 EXPNO 30  
 PROCNO 1  
 F2 - Acquisition Parameters  
 Date\_ 20110118  
 Time 15.57  
 INSTRUM spect  
 PROBHD 5 mm Dual 13C/  
 PULPROG zgpg30  
 TD 65536  
 SOLVENT CDCl3  
 NS 912  
 DS 4  
 SWH 11980.807 Hz  
 FIDRES 0.32209 Hz  
 AQ 2.722011 sec  
 RG 26.6  
 DW 41.100 usec  
 DE 8.00 usec  
 TE 303.2 K  
 D1 2.0000000 sec  
 d11 0.0000000 sec  
 DELTA 1.8999999 sec  
 MCHST 0.0000000 sec  
 MCWRSK 0.0150000 sec  
 ===== CHANNEL f1 =====  
 NUC1 13C  
 P1 6.20 usec  
 PL -6.00 dB  
 SFO1 50.3277500 MHz  
 ===== CHANNEL f2 =====  
 CPROG2 spect16  
 NUC2 1H  
 PPR2 180.00 usec  
 PL2 -4.00 dB  
 PL12 18.00 dB  
 PL13 22.00 dB  
 SFO2 300.1318534 MHz  
 F2 - Processing parameters  
 SI 32768  
 SF 50.3277298 MHz  
 WDW EM  
 SSB 0  
 LB 3.00 Hz  
 GB 0  
 PC 1.40

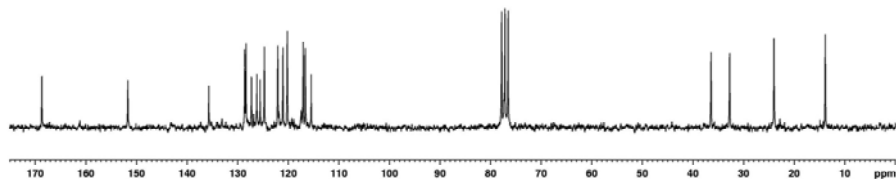

PK-539

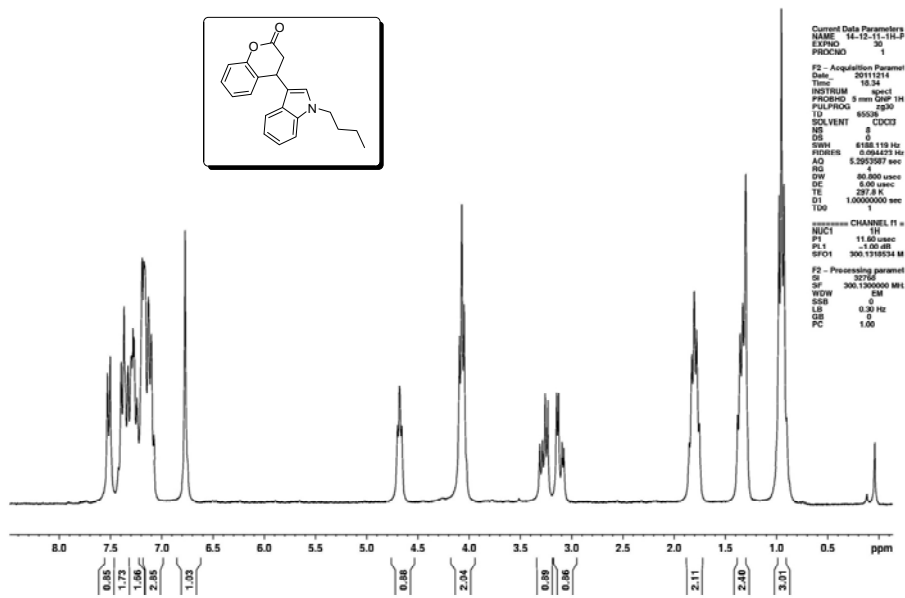

PK-539

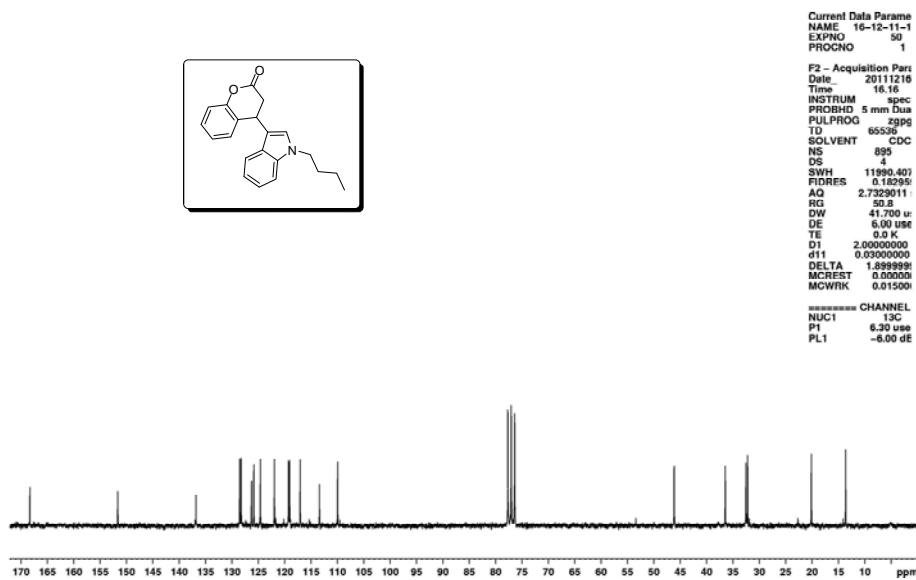

PK-546

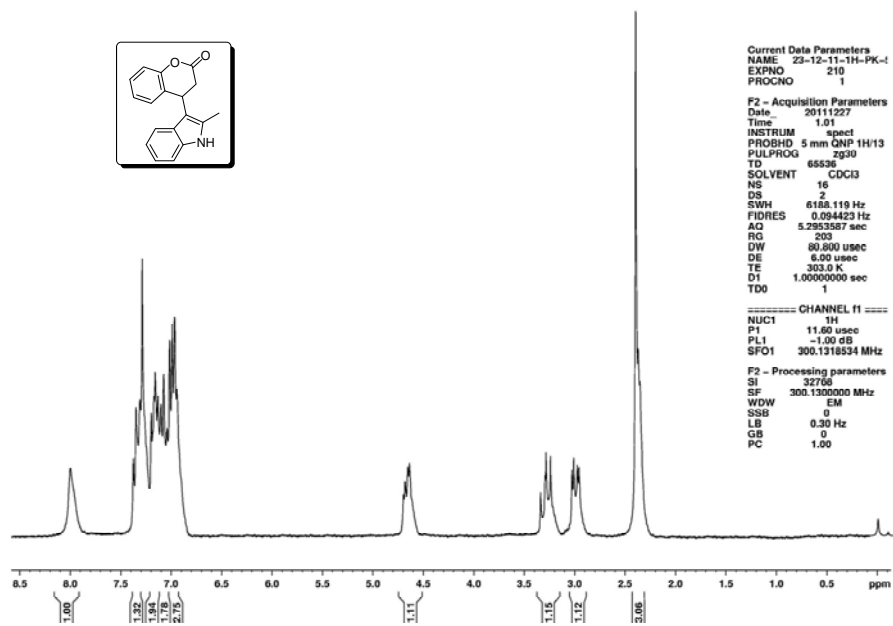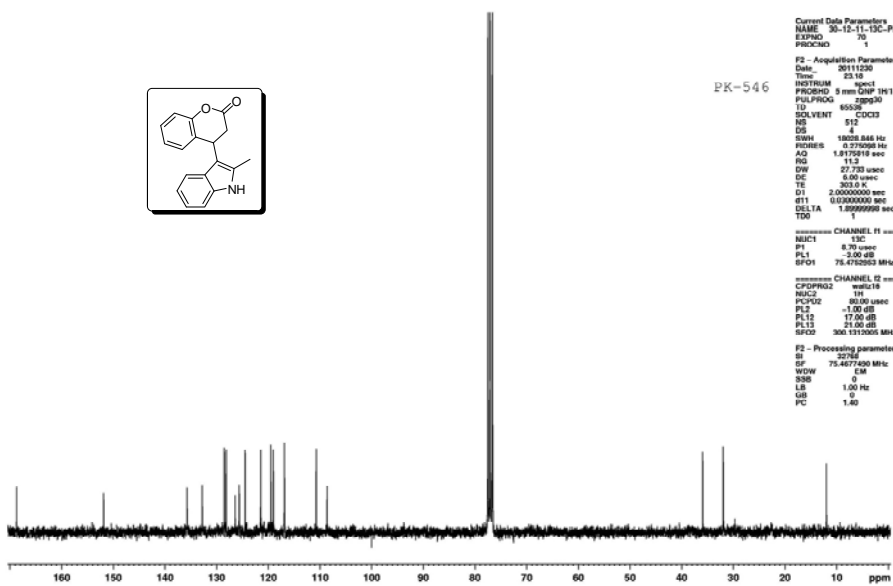

PK-551

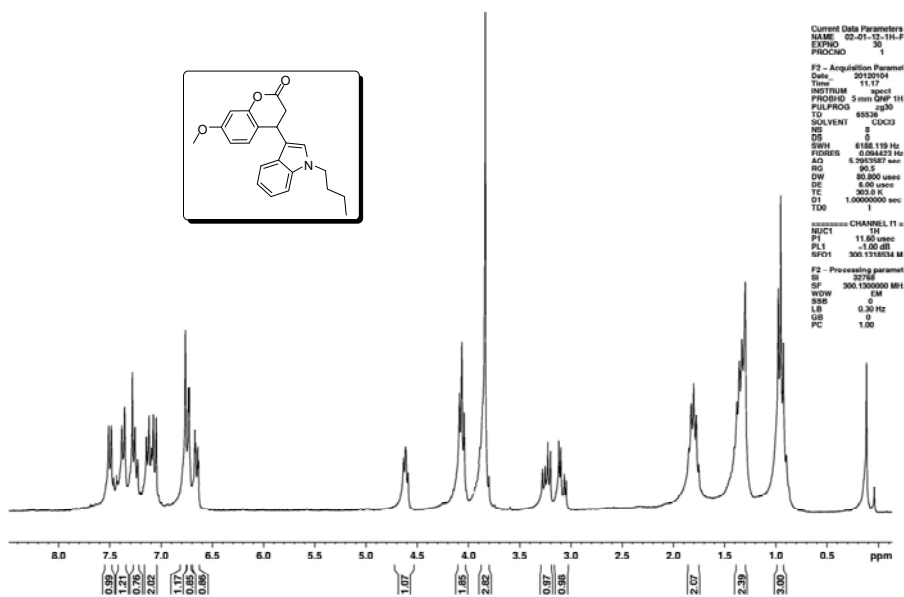

PK-551

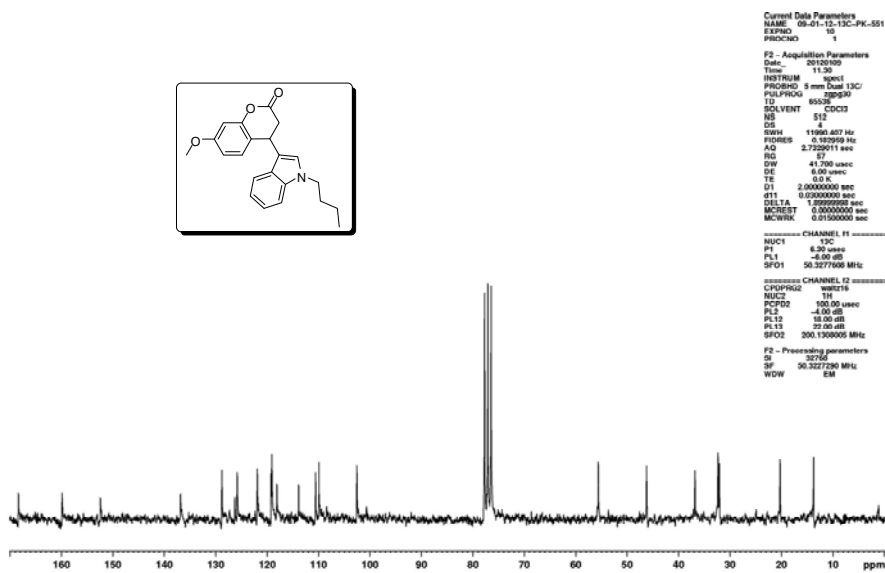

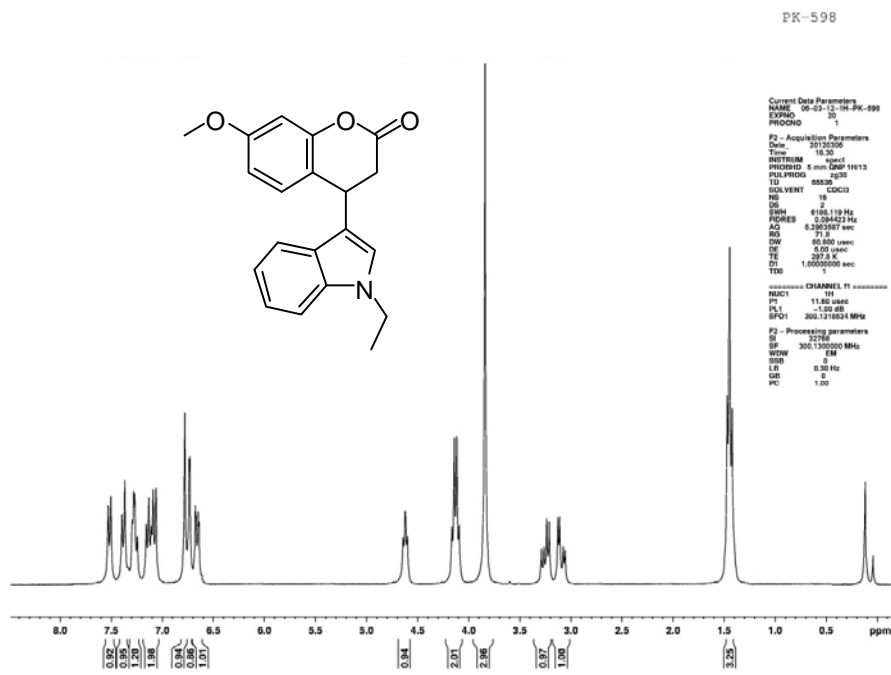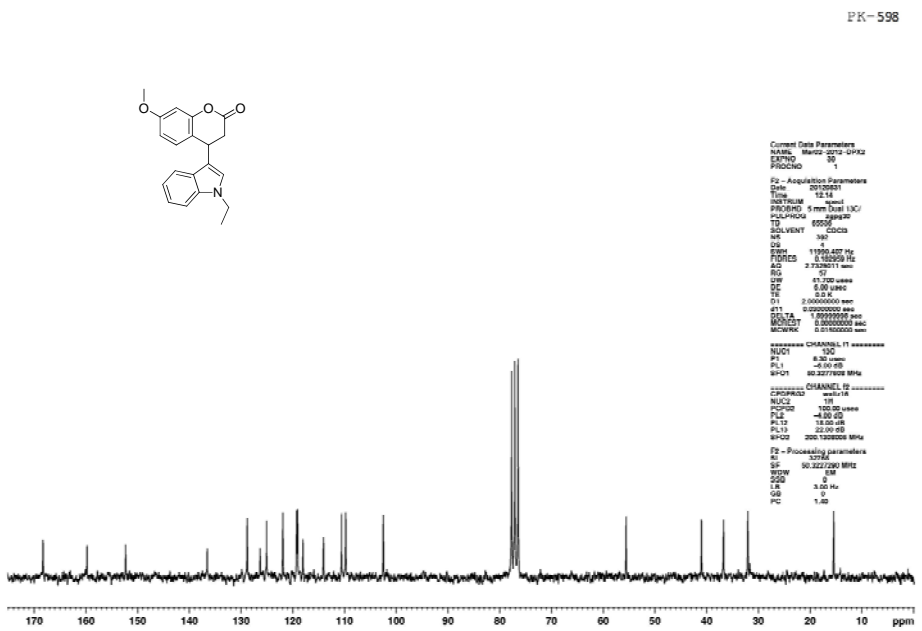

PK-597

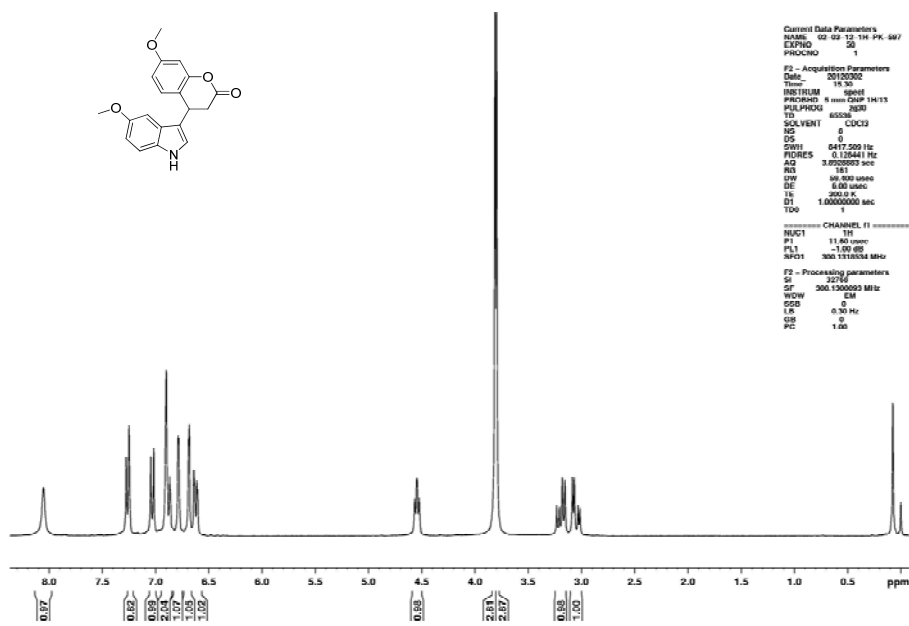

PK-597

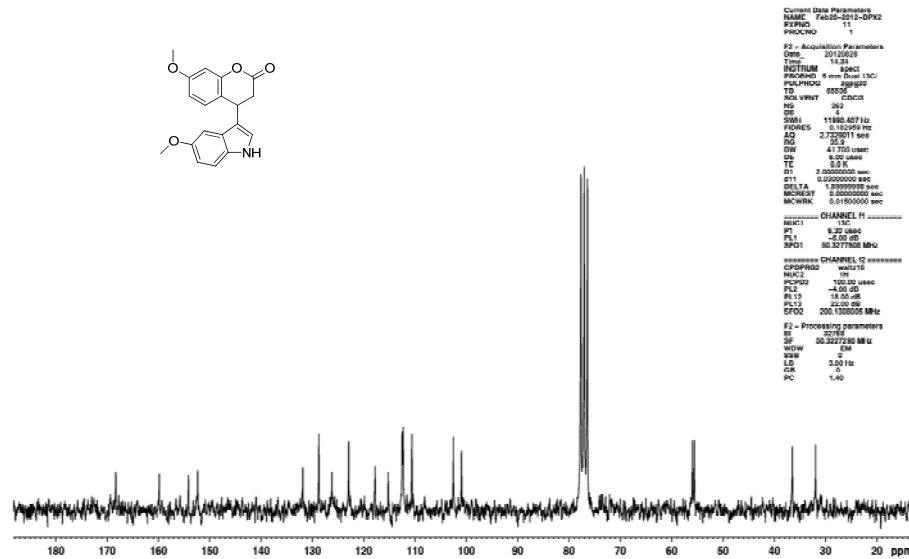

Supplement: c2ra21284f.pdf [file c2ra21284f.pdf]
